# Supplementary material for: Assessment of Nutritional Status by Bioelectrical Impedance in Adult Patients with Celiac Disease: A Prospective Single-Center Study
Source: MDPI journal article supplement (doi:10.3390/nu15122686), 2023-06-09
Supplement: s1 [file s1]

Table S1: Nutritional parameters at T0, T1 and T2, and relative comparisons.

|                                    | T0               | T0 vs T1         |                               |             | T0 vs T2         |                               |              | T1 vs T2                      |            |
|------------------------------------|------------------|------------------|-------------------------------|-------------|------------------|-------------------------------|--------------|-------------------------------|------------|
|                                    |                  | T1               | P (Wilcoxon signed-rank test) | P (t-test)  | T2               | P (Wilcoxon signed-rank test) | P (t-test)   | P (Wilcoxon signed-rank test) | P (t-test) |
| Fat Mass (kg)                      | 12.9 (5.7-25)    | 13.9 (5.9-24.2)  | 0.24                          |             | 12.9 (5.3-24.3)  | 0.80                          |              | 0.10                          |            |
| Fat Free Mass (kg)                 | 45.6 (37.6-70.5) | 45.3 (41.4-52.3) | 0.85                          |             | 46 (38.3-69.4)   | <b>0.004</b>                  |              | <b>&lt;0.001</b>              |            |
| Body Cell Mass Index               | 8.4 (7.2-11.3)   | 9 (8.1-9.6)      | 0.06                          |             | 9.1 (7.6-11.8)   | <b>0.02</b>                   |              | <b>&lt;0.001</b>              |            |
| Fat Mass (%)                       | 22.1 (9.9-37.1)  | 23.4 (15.7-28.6) | 0.42                          |             | 21.1 (11-36.4)   | 0.49                          |              | 0.08                          |            |
| Fat Free Mass (%)                  | 77.9 (62.9-90.1) | 76.6 (71.5-84.3) | 0.42                          |             | 78.9 (63.6-89)   | 0.48                          |              | 0.08                          |            |
| Fat Free Mass Index                | 3 (1-5)          | 3 (2-4)          | 0.53                          |             | 3 (2-5)          | <b>0.01</b>                   |              | <b>0.005</b>                  |            |
| Appendicular Skeletal Muscle Index | 2.5 (1-4)        | 3 (2-3)          | 0.65                          |             | 3 (1-4)          | <b>0.008</b>                  |              | <b>0.005</b>                  |            |
| Body Mass Index (mean±SD)          | 21.9±3.2         | 22.1±3           |                               | 0.31        | 22.2±3.1         |                               | 0.15         |                               | 0.43       |
| Phase Angle (°, mean±SD)           | 5.7±0.6          | 5.9±0.8          |                               | <b>0.04</b> | 6±0.6            |                               | <b>0.002</b> |                               | 0.2        |
| Total Body Water                   | 33.4 (27.3-51.8) | 33.3 (30-38.2)   | 0.9                           |             | 33.8 (27.9-51.1) | <b>0.004</b>                  |              | <b>&lt;0.001</b>              |            |
| Extra-Cellular Water (L)           | 16 (12.8-27.7)   | 16 (14.2-17.2)   | 0.07                          |             | 16 (12.9-23.8)   | 0.16                          |              | 0.40                          |            |
| Extra-Cellular Water (%; mean±SD)  | 47.5±2.8         | 46.1±3.6         | <b>0.006</b>                  |             | 45.9±3.1         | <b>0.01</b>                   |              | 0.95                          |            |
| Waist (cm; (mean±SD)               | 78.7±11.1        | 78.7±9.7         | 0.95                          |             | 79.5±9.6         | 0.32                          |              | 0.18                          |            |
| Abdominal Fat (%; mean±SD)         | 2.9±1.8          | 2.9±1.6          | 0.94                          |             | 3.1±1.6          | 0.29                          |              | 0.15                          |            |
| Handgrip Value                     | 28.1 (16.5-48.7) | 29 (25.7-36.8)   | <b>0.02</b>                   |             | 29.7 (17.3-52.5) | <b>&lt;0.001</b>              |              | 0.10                          |            |
| Muscle Quality Index (mean±SD)     | 1.2 (0.9-1.8)    | 1.3 (1.2-1.4)    | <b>0.02</b>                   |             | 1.3 (0.9-1.6)    | 0.08                          |              | 0.47                          |            |

Table S2. Nutritional status parameters of CeD patients with classical and non-classical presentation.

|                                     | <b>Classical<br/>Presentation<br/>n=10</b> | <b>Non-Classical<br/>Presentation<br/>n=14</b> |                                      |
|-------------------------------------|--------------------------------------------|------------------------------------------------|--------------------------------------|
|                                     |                                            |                                                | <i>P (Wilcoxon signed-rank test)</i> |
| Fat Mass (kg)                       | 11 (6.7-24.9)                              | 9 (5.7-25)                                     | 0.35                                 |
| Fat Free Mass (kg)                  | 43.9 (38.4-56.4)                           | 47.1 (37.6-70.5)                               | 0.27                                 |
| Body Cell Mass Index                | 8.4 (7.6-9.6)                              | 8.4 (7.2-11.3)                                 | 0.66                                 |
| Fat Mass (%)                        | 19.5 (11.6-37.1)                           | 24 (9.9-36.6)                                  | 0.73                                 |
| Fat Free Mass (%)                   | 80.5 (62.9-88.4)                           | 76 (63.7-90.1)                                 | 0.73                                 |
| Fat Free Mass Index                 | 3 (1-4)                                    | 3 (2-5)                                        | 0.42                                 |
| Appendicular Skeletal Muscle Index  | 2 (1-3)                                    | 3 (1-4)                                        | 0.42                                 |
| Body Mass Index (mean±SD)           | 21±3.1                                     | 22.5±3.1                                       | 0.25                                 |
| Phase Angle (°, mean±SD)            | 5.7±0.5                                    | 5.6±0.6                                        | 0.60                                 |
| Total Body Water                    | 32.2 (27.9-41.4)                           | 34.5 (27.3-51.8)                               | 0.27                                 |
| Extra-Cellular Water (L)            | 15.4 (12.8-19.7)                           | 16.7 (13.3-27.7)                               | 0.07                                 |
| Extra-Cellular Water (%<br>mean±SD) | 47.1±2.7                                   | 47.7±3                                         | 0.60                                 |
| Waist (cm, (mean±SD)                | 76.2±8.6                                   | 80.4±12.5                                      | 0.37                                 |
| Abdominal Fat (%<br>mean±SD)        | 2.8±2                                      | 3±1.7                                          | 0.78                                 |
| Handgrip Value                      | 28 (20-40)                                 | 28.8 (16.5-48.7)                               | 0.81                                 |
| Muscle Quality Index<br>(mean±SD)   | 1.2 (1.1-1.8)                              | 1.3 (0.9-1.4)                                  | 0.78                                 |
